# Supplementary material
Source: PubMed Central journal article supplement (PMC5500805)
Supplement: 10.1074_M116.769802_jbc.M116.769802-1.pdf [file 10.1074_M116.769802_jbc.M116.769802-1.pdf]

## **Supplemental Material:**

**Table-S1:** Description of the different craniofacial landmarks used in the cephalometric analysis of micro-CT scans of WT and *Mgp*<sup>-/-</sup> mice (Figure 2A and B) (49).

| <b>Measurement</b>                    | <b>From</b>                                     | <b>To</b>                  |
|---------------------------------------|-------------------------------------------------|----------------------------|
| <b>Craniofacial</b>                   |                                                 |                            |
| <b>Cranial length</b>                 | Internasal                                      | Occipital                  |
| <b>Skull height</b>                   | Tympanic point                                  | Parietal points            |
| <b>Inter-nasal distance</b>           | Right nasal lateral point                       | Left nasal lateral point   |
| <b>Inter-orbitary length</b>          | Right infra-orbital point                       | Left infra-orbital point   |
| <b>Inter-zygomatic distance</b>       | Right zygomatic                                 | Left zygomatic             |
| <b>Bi-temporal distance</b>           | Right jugal process                             | Left jugal process         |
| <b>Maxillary</b>                      |                                                 |                            |
| <b>Maxillary length</b>               | Intersection of sutura coronalis and sagittalis | Nasomaxillary              |
| <b>Palatine length</b>                | Posterior nasal spine (PNS)                     | Inter dental point         |
| <b>Anterior cranial height</b>        | Nasomaxillary point                             | Prosthion                  |
| <b>Upper incisor height</b>           | Upper incisor-alveolar bone                     | Superior incisor point     |
| <b>Inter-molar maxillary distance</b> | Right 1 <sup>st</sup> molar                     | Left 1 <sup>st</sup> molar |
| <b>Mandibular</b>                     |                                                 |                            |
| <b>Effective mandible length</b>      | Lower incisor-alveolar bone                     | Condilion                  |
| <b>Mandible plain</b>                 | Lower incisor-alveolar bone                     | Gonion                     |
| <b>Mandible axis</b>                  | Antegonium                                      | Menton                     |
| <b>Inferior incisor height</b>        | Lower incisor-alveolar bone                     | Lower edge                 |
| <b>Anterior mandible height</b>       | Menton                                          | Mandibular alveolar        |
| <b>Ascending ramus length</b>         | Antegonium notch                                | condilion                  |
| <b>Posterior mandible height</b>      | Gonion                                          | Condilion                  |
| <b>Inter-molar mandible distance</b>  | Right 1 <sup>st</sup> molar                     | Left 1 <sup>st</sup> molar |

**Table-S2:** Description of the different craniofacial landmarks used in the 2D viscerocranium and basicranium analysis of WT and *Mgp*<sup>-/-</sup> mice (Figure 6) (28).

| <b>Landmarks</b> | <b>Anatomic description</b>                |
|------------------|--------------------------------------------|
| <b>1</b>         | Most anterior point of nasal bones         |
| <b>2</b>         | Most anterior point of the presphenoid     |
| <b>3</b>         | Most anterior margin of the ISS            |
| <b>4</b>         | Most anterior margin of the SOS            |
| <b>5</b>         | Most anterior point of the foramen magnum  |
| <b>6</b>         | Most posterior point of the occipital bone |

| <b>Linear Measurements</b> | <b>From-to</b> |
|----------------------------|----------------|
| Viscerocranium             | 1-2            |
| Presphenoid                | 2-3            |
| Basisphenoid               | 3-4            |
| Basioccipital              | 4-5            |
| Posterior cranial high     | 5-6            |
| Total basicranial length   | 2-3-4-5        |
| Total skull length         | 1-2-3-4-5-6    |
